# Supplementary material
Source: PubMed Central journal article supplement (PMC6704476)
Supplement: NIHMS1030809-supplement-supplement_table.pdf [file NIHMS1030809-supplement-supplement_table.pdf]

## Supplemental Data

**Supplemental Table 1. PCR primers for genotyping used in the present study.**

| <b>Mutant mice</b>                         | <b>Direction</b> | <b>Sequence</b>             |
|--------------------------------------------|------------------|-----------------------------|
| <b><math>\beta</math>2ARKO</b>             | Forward (KO)     | 5'-CACGAGACTAGTGAGACGTG-3'  |
|                                            | Forward (WT)     | 5'-ACCAAGAATAAGGCCCGAGT-3'  |
|                                            | Reverse          | 5'-CCGGGAATAGACAAAGACCA-3'  |
| <b>Pn-Cre</b>                              | Forward          | 5'-CGATGCAACGAGTGATGAGG-3'  |
|                                            | Reverse          | 5'-GCATTGCTGTCACTTGGTCGT-3' |
| <b>CAG-CAT-<br/>PKA<math>\alpha</math></b> | Forward          | 5'-ACGCCAATAGGGACTTTCCA-3'  |
|                                            | Reverse          | 5'-AGAGTGAAGCAGAACGTGGG-3'  |

**Supplemental Table 2. PCR primers for RT-PCR used in the present study.**

| <b>Gene</b>        | <b>Direction</b> | <b>Sequence</b>                   |
|--------------------|------------------|-----------------------------------|
| <b>Nppa</b>        | Forward          | 5'-GTGTACAGTGCGGTGTCCAAC-3'       |
|                    | Reverse          | 5'-AGAGCACTGCCGTCTCTCAG-3'        |
| <b>Nppb</b>        | Forward          | 5'-TTTGGGCTGTAACGCACTG-3'         |
|                    | Reverse          | 5'-ACTTCAAAGGTGGTCCCAGAG-3'       |
| <b>Acta1</b>       | Forward          | 5'-AGGGCCAGAGTCAGAGCAG-3'         |
|                    | Reverse          | 5'-CCGTTGTCACACACAAGAGC-3'        |
| <b>Gapdh</b>       | Forward          | 5'-CATCACCATCTTCCAGGAGCG-3'       |
|                    | Reverse          | 5'-GAGGGGCCATCCACAGTCTTC-3'       |
| <b>Col1a2</b>      | Forward          | 5'-GCCAGTGCTGTGCTTTCTG-3'         |
|                    | Reverse          | 5'-TCCCTCGACTCCTACATCTTC-3'       |
| <b>Col3a1</b>      | Forward          | 5'-ATGCCACAGCCTTCTACAC-3'         |
|                    | Reverse          | 5'-CCCAGGGTCACCATTTCTCC-3'        |
| <b>Adrb1 mouse</b> | Forward          | 5'-ACCAGACCATGTCAAACCCT-3'        |
|                    | Reverse          | 5'-AGGGGTGTCTCGAAGGTATT-3'        |
| <b>Adrb2 mouse</b> | Forward          | 5'-GGGTAATCTTCCTCCAGGGT-3'        |
|                    | Reverse          | 5'-GTCTGTAGGGTTGGGCTGTT-3'        |
| <b>Adrb3 mouse</b> | Forward          | 5'-AAGAGACTTCCATCCAGTTGCCTTC-3'   |
|                    | Reverse          | 5'-ATTATATCCAGTTTGGTAGCATCCATC-3' |
